# Supplementary material
Source: PubMed Central journal article supplement (PMC7927326)
Supplement: jcsm.8942.ds001.pdf [file jcsm.8942.ds001.pdf]

## Influence of depressive states

All individuals who had a history of a unipolar depressive syndrome and were taking SSRI, but were asymptomatic on the BDI (score <14) were included in the SSRI-asymptomatic group (n = 74). As per the exclusion criteria for the other depression groups, all individuals in the SSRI-asymptomatic group had no co-morbid bipolar disorder, psychotic disorder, post-traumatic stress disorder, or neurocognitive disorder. None of them were taking any other type of psychotropic medication except SSRIs. Mixed ANCOVAs were used to compare all-night AHI between subgroups based on depressive states and SSRI use: Control, Non-medicated, SSRI, and Asymptomatic-SSRI. These ANCOVAs included age, sex, and BMI as covariates.

A significant group effects ( $F(3, 411)=3.6, p=.013$ ; Figure S1) showed that the SSRI group had significantly higher AHI than all other groups (all  $p<.033$ ). The Asymptomatic-SSRI group did not differ significantly from the control group ( $p=.225$ ) or from the Non-medicated group ( $p=.597$ ).

**Figure S1. All night AHI in subgroups based on depressive states and SSRI use**

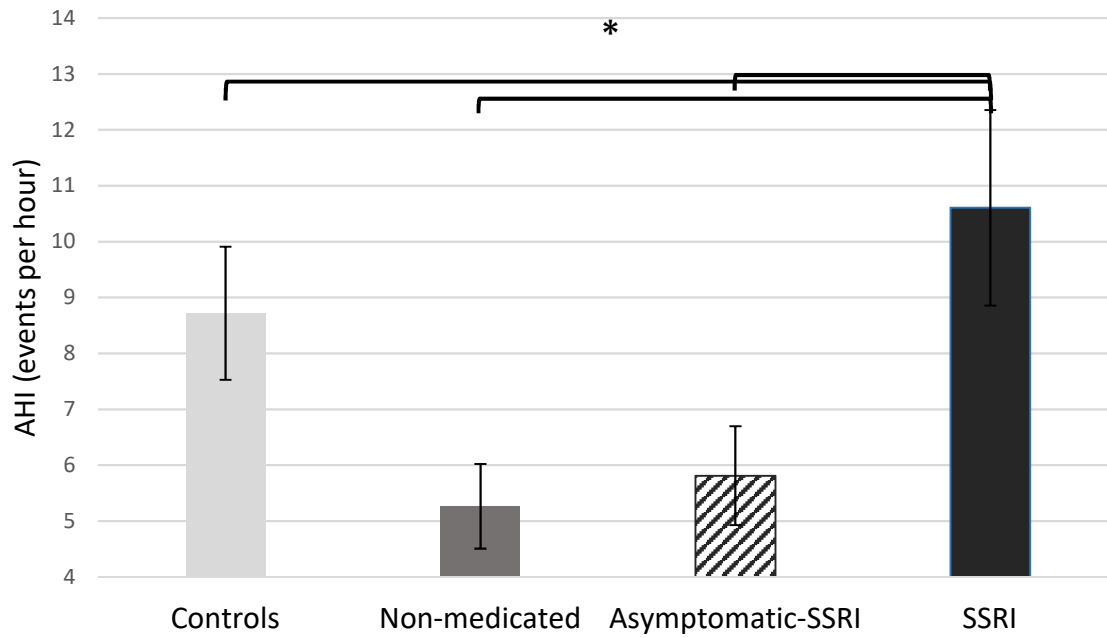

AHI = apnea-hypopnea index (events per hour). \*  $p < .050$ . Analyses were adjusted for age, sex and BMI.
